# Supplementary material for: Combination of scoring schemes for protein docking
Source: PubMed Central journal article supplement (PMC1978211; doi:10.1186/1471-2105-8-279), 2007-08-01
Supplement: 1471-2105-8-279-S1.pdf [file 1471-2105-8-279-S1.pdf]

| atom-class | antibody-antigen | std.-dev. | enzyme-inhibitor | std.-dev. | others | std.-dev. |
|------------|------------------|-----------|------------------|-----------|--------|-----------|
| 1          | 0,00             | 0,00      | 0,01             | 0,01      | 0,00   | 0,00      |
| 2          | 8,62             | 3,45      | 3,30             | 1,78      | 14,88  | 2,65      |
| 3          | 0,00             | 0,00      | 0,04             | 0,04      | 0,00   | 0,00      |
| 4          | 0,01             | 0,00      | 0,01             | 0,01      | 0,00   | 0,00      |
| 5          | 1,28             | 0,85      | 0,07             | 0,09      | 0,00   | 0,00      |
| 6          | 7,50             | 0,39      | 6,18             | 0,95      | 3,75   | 0,83      |
| 7          | 6,52             | 1,37      | 6,20             | 2,96      | 9,52   | 4,01      |
| 8          | 0,18             | 0,28      | 2,61             | 0,32      | 0,00   | 0,00      |
| 9          | 10,08            | 8,49      | 25,77            | 8,78      | 5,59   | 6,05      |
| 10         | 4,78             | 2,12      | 0,07             | 0,03      | 11,03  | 9,92      |
| 11         | 9,21             | 9,07      | 19,61            | 7,27      | 17,64  | 12,79     |
| 12         | 10,00            | 1,48      | 8,81             | 1,12      | 8,76   | 2,20      |
| 13         | 3,51             | 4,17      | 2,08             | 3,28      | 0,02   | 0,03      |
| 14         | 1,93             | 2,96      | 6,81             | 7,19      | 11,03  | 11,03     |
| 15         | 0,00             | 0,00      | 0,00             | 0,01      | 3,14   | 2,71      |
| 16         | 0,00             | 0,00      | 1,83             | 1,64      | 6,88   | 1,77      |
| 17         | 0,00             | 0,00      | 6,29             | 1,18      | 2,90   | 2,81      |
| 18         | 5,31             | 3,16      | 2,28             | 1,19      | 0,00   | 0,00      |
| 19         | 0,34             | 0,33      | 5,28             | 5,37      | 5,72   | 7,51      |
| 20         | 0,24             | 0,38      | 0,67             | 0,75      | 0,00   | 0,00      |
| 21         | 0,01             | 0,00      | 11,61            | 5,29      | 0,01   | 0,02      |
| 22         | 1,18             | 1,86      | 0,01             | 0,00      | 6,29   | 2,45      |
| 23         | 11,29            | 5,60      | 25,18            | 13,60     | 1,68   | 2,57      |
| 24         | 19,60            | 5,97      | 14,26            | 5,46      | 0,00   | 0,00      |
| 25         | 0,73             | 0,93      | 1,56             | 2,19      | 2,90   | 3,88      |
| 26         | 0,03             | 0,03      | 2,79             | 1,98      | 0,01   | 0,01      |
| 27         | 0,26             | 0,40      | 0,01             | 0,01      | 0,00   | 0,00      |
| 28         | 3,31             | 1,37      | 0,02             | 0,01      | 0,00   | 0,00      |
| 29         | 0,05             | 0,05      | 5,18             | 4,22      | 0,00   | 0,00      |
| 30         | 1,84             | 2,00      | 16,88            | 4,50      | 11,23  | 5,73      |
| 31         | 0,18             | 0,24      | 30,84            | 5,48      | 8,21   | 6,79      |
| 32         | 4,91             | 2,02      | 0,05             | 0,03      | 0,11   | 0,22      |
| 33         | 5,66             | 0,99      | 1,32             | 1,51      | 6,80   | 2,73      |
| 34         | 0,95             | 1,49      | 0,01             | 0,01      | 9,00   | 5,60      |
| 35         | 1,22             | 1,33      | 0,01             | 0,00      | 9,92   | 2,99      |
| 36         | 0,04             | 0,05      | 10,91            | 4,36      | 1,56   | 1,53      |
| 37         | 0,03             | 0,04      | 0,30             | 0,33      | 0,00   | 0,00      |
| 38         | 20,75            | 7,43      | 1,61             | 2,39      | 3,15   | 4,17      |
| 39         | 8,46             | 5,35      | 0,03             | 0,03      | 0,00   | 0,00      |
| 40         | 23,18            | 1,49      | 5,46             | 1,39      | 18,08  | 7,25      |
| l1         | -0,87            | 0,29      | 0,67             | 0,57      | 0,70   | 0,28      |

### Optimised atom specific weighting factors

Optimised atom specific weighting factors for the 40 atom-types defined by Melo *et al.*[10] for all three complex classes and the standard deviation as derived from the 5-fold crossvalidation.
