# Supplementary material for: Combination of scoring schemes for protein docking
Source: PubMed Central journal article supplement (PMC1978211; doi:10.1186/1471-2105-8-279), 2007-08-01
Supplement: 1471-2105-8-279-S2.pdf [file 1471-2105-8-279-S2.pdf]

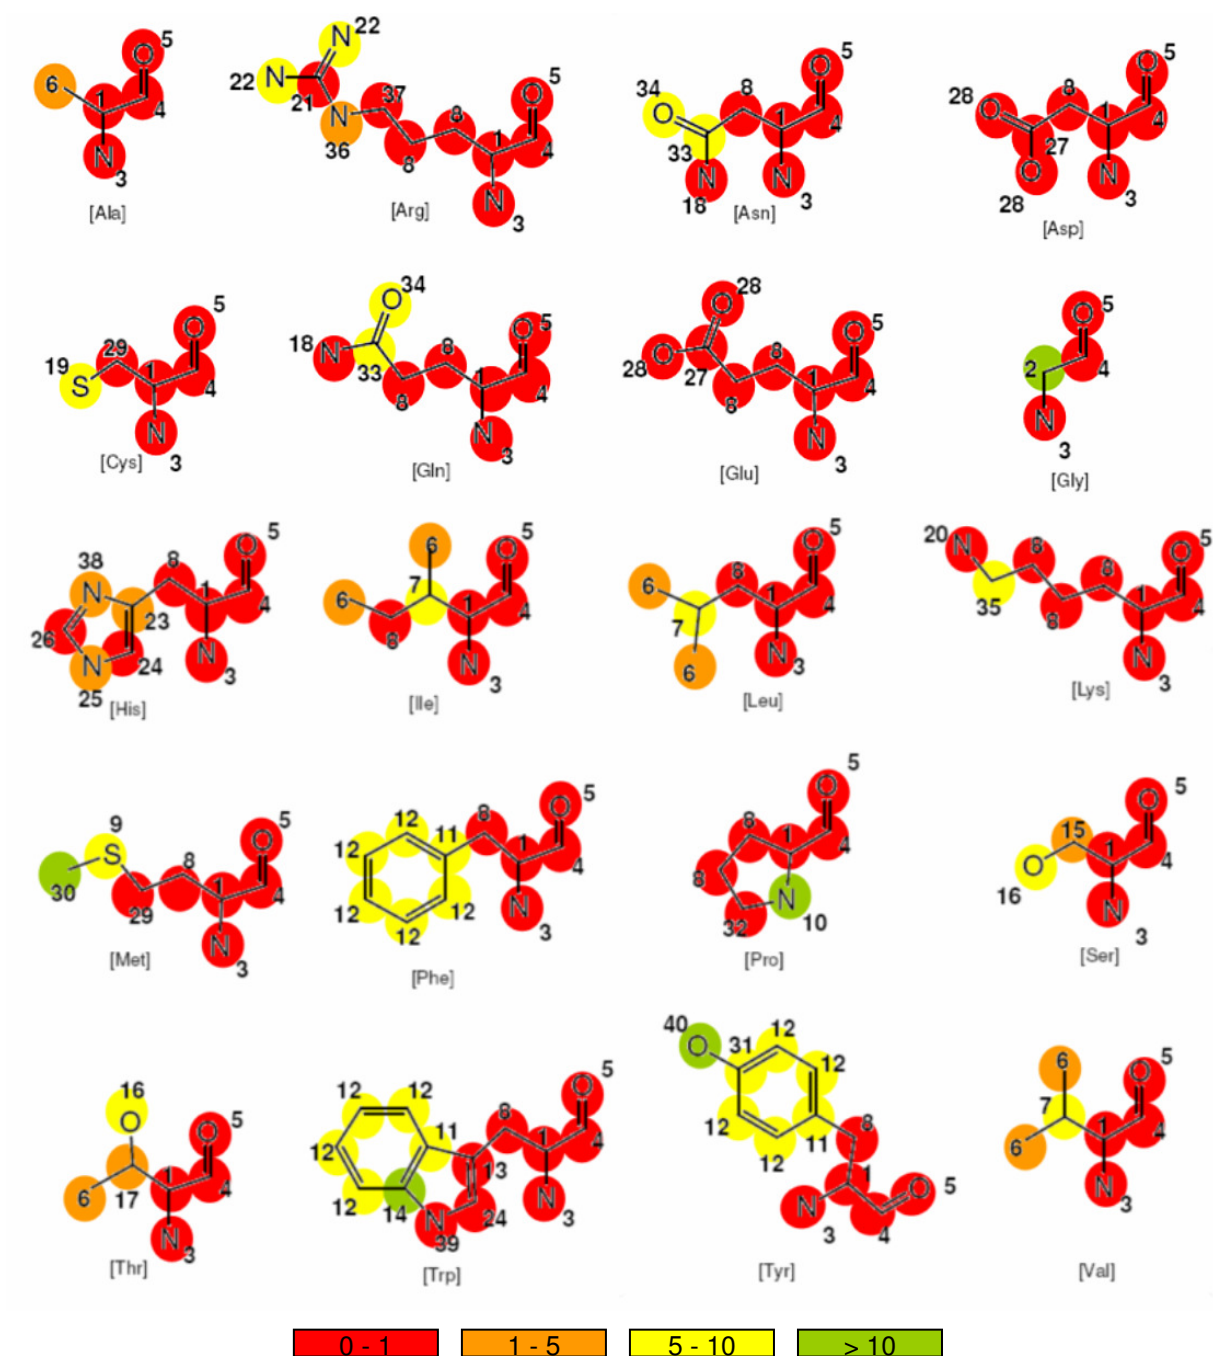

### Optimised atom specific weighting factors

Colour coded atom specific weighted factors mapped on the 2D structures of the amino acids for other complexes (the numbers next to the atoms indicate the atom class)
